# 1 Full-likelihood analysis of genomic data clarifies a complex 2 history of species divergence and introgression in the *erato-* 3 *sara* group of *Heliconius* butterflies

4 Yuttapong Thawornwattana<sup>1</sup>, Fernando A. Seixas<sup>1</sup>, Ziheng Yang<sup>2\*</sup>, James Mallet<sup>1\*</sup>

5 <sup>1</sup> Department of Organismic and Evolutionary Biology, Harvard University, Cambridge, MA 02138,  
6 USA

7 <sup>2</sup> Department of Genetics, Evolution and Environment, University College London, London WC1E  
8 6BT, UK

9 **Corresponding authors:** [z.yang@ucl.ac.uk](mailto:z.yang@ucl.ac.uk), [jmallet@oeb.harvard.edu](mailto:jmallet@oeb.harvard.edu)

10

11 **Running head:** INTROGRESSION HISTORY OF ERATO-SARA HELICONIUS

12

13 **ABSTRACT**

14 Introgression plays a key role in adaptive evolution and species diversification in many groups of  
15 species including *Heliconius* butterflies. However, frequent hybridization and gene flow between  
16 species makes estimation of the species phylogeny challenging, especially for rapidly speciating  
17 species within adaptive radiations. Here, we analyze the genomic sequences from six members of  
18 the *erato-sara* clade of *Heliconius* butterflies to infer the species phylogeny and cross-species  
19 introgression events. To avoid heterozygote phasing errors in haploid sequences commonly  
20 produced by genome assembly methods, we processed and compiled unphased diploid sequence  
21 alignments, with the analytical methods averaging over uncertainties in heterozygote phase  
22 resolution. We use likelihood-based methods under the multispecies coalescent (MSC) model with  
23 and without gene flow to accommodate random fluctuations in genealogical history across the  
24 genome due to deep coalescence. There is robust evidence of introgression across the genome, both  
25 among distantly related species deep in the phylogeny and between sister species in shallow parts of  
26 the tree. We obtain estimates of population parameters such as introgression times and  
27 probabilities, species divergence times, and population sizes for modern and ancestral species. We  
28 confirm ancestral gene flow between the *sara* clade and an ancestral population of *H. telesiphe*, a  
29 likely hybrid origin of *H. hecalesia*, and gene flow between the sister species *H. erato* and *H. himera*.  
30 Our approach also demonstrates how introgression among ancestral species can explain the history  
31 of two chromosomal inversions deep in the phylogeny of the group. For the first time, we not only  
32 test for the presence of cross-species gene flow, but also estimate its direction, timing and  
33 magnitude, extracting rich historical information of species divergence and gene flow from genomic  
34 data.

35 **Keywords:** 3s, BPP, *erato*, gene flow, *Heliconius*, introgression, multispecies coalescent, inversion

36

37

## 38 INTRODUCTION

39 Thanks to increasing availability of genomic data and advances in analytical methods (Sousa and Hey  
40 2013; Payseur and Rieseberg 2016), hybridization or introgression has been detected in a variety of  
41 species including *Anopheles* mosquitoes (Fontaine et al. 2015), *Panthera* cats (Figueiró et al. 2017)  
42 and cichlid fishes (Malinsky et al. 2018), as well as *Heliconius* butterflies (Dasmahapatra et al. 2012;  
43 Jay et al. 2018; Edelman et al. 2019; Kozak et al. 2021). Introgression is increasingly recognized as an  
44 important process that introduces genetic diversity into the receiving population and potentially  
45 contributes to adaptive evolution (Mallet et al. 2016; Taylor and Larson 2019; Edelman and Mallet  
46 2021). Whether gene flow occurs and what role it plays during the process of species divergence is  
47 increasingly seen as important to a fuller understanding of speciation (Pinho and Hey 2010; Feder et  
48 al. 2012).

49 *Heliconius* is a rapidly radiating group of butterflies in tropical America. They are unpalatable to  
50 predators and are perhaps best known for mimicry in which a single species can have many different  
51 wing coloration patterns across its geographical range (classified as subspecies) while multiple  
52 unrelated sympatric species have converged to share the same wing pattern in local regions as a  
53 common warning sign to deter predators (Bates 1862; Müller 1879). The genus *Heliconius* comprises  
54 two major clades, the *erato-sara* clade and the *melpomene*-silvaniform clade, which diverged around  
55 10–12 million years ago (Ma) in the Miocene (Kozak et al. 2015). Natural hybridization among  
56 species is well-documented within each clade (Mallet et al. 2007). The prevalence of introgression  
57 between species coupled with rapid radiation and diversification of species and geographic races  
58 makes estimation of the species phylogeny challenging. As a result, our understanding of the history  
59 of species divergence and introgression in *Heliconius* remains limited. This work aims to resolve the  
60 history of key speciation events and cross-species introgression in the *erato-sara* clade.

61 Most previous studies of the genus *Heliconius*, including the *erato* group, have focused on  
62 evolutionary relationships and gene flow at specific regions of the genome, especially the colour  
63 pattern loci responsible for phenotypic variation in the mimetic wing patterns, typically in a few  
64 species, and mainly in the *melpomene*-silvaniform clade where gene flow appears to be more  
65 prevalent (Dasmahapatra et al. 2012; Nadeau et al. 2013; Martin and Van Belleghem 2017; Jay et al.  
66 2018; Balaban et al. 2019). Other studies have focused on wing-colour pattern loci between two  
67 species with comimic races, *H. erato* (*erato-sara* clade) and *H. melpomene* (*melpomene*-silvaniform  
68 clade) (Hines et al. 2011; Reed et al. 2011).

69 Earlier molecular phylogenetic studies of *Heliconius* were based on a small number of loci (Brower  
70 1994; Brower and Egan 1997; Beltrán et al. 2002; Beltrán et al. 2007; Kozak et al. 2015), revealing  
71 variation in gene genealogies among loci. In particular, Kozak et al. (2015) employed BUCKy (Larget  
72 et al. 2010) and \*BEAST (Heled and Drummond 2010) to account for the heterogeneity of gene  
73 genealogies across loci. Hybridization and introgression were acknowledged but not directly  
74 accounted for in their analytical methods. Kozak et al. (2021) analyzed genome-wide coding loci  
75 from >100 individuals from 40 *Heliconius* species to estimate the species tree using approximate  
76 multispecies coalescent (MSC) methods such as ASTRAL (Mirarab et al. 2014) and MP-EST (Liu et al.  
77 2010), and to test for introgression using a range of summary methods including the *D* statistic (or  
78 ABBA-BABA test) (Patterson et al. 2012),  $f_4$  (Reich et al. 2009), and an approximate multispecies  
79 coalescent with introgression (MSCi) method PHYLONET/MPL (Yu and Nakhleh 2015). The *D* and  $f_4$   
80 statistics use site-pattern counts averaged over the genome, ignoring information in genealogical  
81 fluctuations across the genome, while PHYLONET/MPL takes gene trees as input without accounting  
82 for phylogenetic reconstruction errors and uncertainties. Van Belleghem et al. (2017) estimated the  
83 species phylogeny of the *erato* clade from concatenated autosomal SNP data, focusing on wing  
84 colour pattern loci among different geographic races of *H. erato*. Recently, Edelman et al. (2019)  
85 conducted phylogenetic analyses with sixteen new genome assemblies of *Heliconius* species using  
86 sliding windows and ASTRAL (Mirarab et al. 2014). Introgression was tested using *D* statistics

87 (Patterson et al. 2012) and a new test called QuIBL based on average internal branch lengths in  
88 estimated triplet gene trees, while MSci network models were inferred using PHYLONET/MCMC\_SEQ  
89 (Wen and Nakhleh 2018). Summary methods such as *D* statistics and QuIBL are based on genome-  
90 wide averages and ignore information from genealogical variation across the genome in multi-locus  
91 sequence data; they ignore gene flow between sister species and have limited ability to characterize  
92 the direction, timing, and magnitude of gene flow (as measured by the migration rate or  
93 introgression probability). PHYLONET/MCMC\_SEQ is a Bayesian Markov chain Monte Carlo (MCMC)  
94 method based on sequence alignments, but is computationally applicable only to a small number of  
95 loci. In Edelman et al. (2019), PHYLONET produced inferences with considerable uncertainty of  
96 species tree topology and timing and directions of introgression. Finally, Massardo et al. (2020) re-  
97 analyzed genome data from the *erato-sara* clade after adding two additional genomes using  
98 approaches similar to those of Edelman et al. (2019).

99 The sliding-window analysis is a useful descriptive tool for exploratory analysis of genomic data  
100 (Martin and Van Belleghem (2017) but could run into difficulties when used in inference. The  
101 proportions of gene trees among the nonoverlapping sliding windows do not have a clear biological  
102 interpretation, as they depend on window size and reflect phylogenetic reconstruction errors,  
103 stochastic coalescent fluctuations, as well as population-level processes such as species divergences  
104 and cross-species introgression. To use estimated gene trees from the windows for inference, one  
105 must consider the likelihood for the observed gene tree distributions from the sliding windows  
106 under alternative models (for example, a complete isolation model versus a model of continuous  
107 migration after species divergence). Even under a complete-isolation model, large fluctuations in  
108 gene tree topologies and sequence divergences are expected due to the natural coalescent  
109 fluctuations (Barton 2006), and the gene-tree discordance can range anywhere from near 0 to near  
110 1, depending on the parameters in the model. Introgression and phylogenetic reconstruction errors  
111 add further variation. Furthermore, estimated gene-tree proportions are sensitive to the choice of  
112 window size: with small windows, the results may be affected by phylogenetic errors, whereas with  
113 large windows, one or two gene trees will dominate due to the averaging effects, even though the  
114 average gene tree for the sliding window may differ from the species tree (Roch and Steel 2015).  
115 Indeed, a previous sliding-window analysis appeared to have produced incorrect species trees for  
116 the *Anopheles gambiae* group of African mosquitoes (Fontaine et al. 2015; Thawornwattana et al.  
117 2018). It is thus worth asking whether similar systematic biases affected the sliding-window analysis  
118 in Edelman et al. (2019).

119 A standard practice in genome assembly has been to "haploidify" the diploid sequence to a single  
120 haploid sequence for each genome, with each heterozygous site represented by only one nucleotide  
121 base, e.g., the one with more reads. This loses half of the information, and, worse still, produces  
122 chimeric haplotypes that do not exist in nature because the genotypic phase at heterozygous sites is  
123 resolved effectively at random. Recent simulation studies (Andermann et al. 2019; Huang et al.  
124 2021) found that such haploid consensus sequences can lead to serious biases in downstream  
125 phylogenomic analyses if the species tree is shallow, with species divergence times comparable to  
126 coalescent times. The impact of phasing errors in haploidified sequences on estimation of species  
127 trees and inference of gene flow in *Heliconius* is unknown. In this paper, we processed the raw  
128 reads for the genomic data of Edelman et al. (2019) for six species in the *erato-sara* clade to compile  
129 alignments of unphased diploid genomic sequences, and used them as input data for analysis using  
130 BPP. The BPP program (Yang 2015; Flouri et al. 2018) implements a method that analytically  
131 integrates over all possible phase resolutions of heterozygotes, weighting them according to their  
132 likelihood based on the sequence alignment at the locus (Gronau et al. 2011). In simulations, this  
133 approach performed nearly as well as analysis of fully phased diploid genomes (which could be  
134 generated, for instance, by costly single-molecule cloning and sequencing) (Huang et al. 2021).

135 We infer the species phylogeny and introgression history of the six species. Unlike previous

136 attempts, we used two coalescent-based full-likelihood phylogenetic approaches that explicitly  
137 account for deep coalescence and introgression as sources of genealogical variation across the  
138 genome. One approach is based on a multispecies coalescent model with introgression (MSci)  
139 (Degnan 2018; Wen and Nakhleh 2018; Zhang et al. 2018), implemented in the program BPP (Flouri  
140 et al., 2020). In this approach, introgression is modelled as discrete events that occur at particular  
141 time points in the past. Another approach is based on an isolation-with-migration (IM) model (Hey  
142 and Nielsen 2004; Hey 2010) implemented in the program 3s (Zhu and Yang 2012; Dalquen et al.  
143 2017), which allows for continuous migration at a constant rate per generation after species  
144 divergence. Advantages of using full likelihood methods over approximate coalescent methods or  
145 summary statistics include making full use of information in the sequence data and properly  
146 accounting for uncertainty in gene trees (Xu and Yang 2016). These methods allow us not only to  
147 infer the presence of gene flow, but also to estimate its direction, timing and magnitude, along with  
148 species divergence times and effective population sizes. Estimation of such important evolutionary  
149 parameters from genome-scale sequence data can provide powerful insights into the divergence  
150 history of species, and a basis for further investigations of the evolution of adaptive traits of interest.

151

## 152 METHODS

### 153 *Genome sequence data and genotyping*

154 We generated new alignments of unphased diploid sequences by processing the raw sequencing  
155 read data of Edelman et al. (2019). The base-calling error rate (or per-base sequencing error rate)  
156 was estimated from the genomic data. We developed a procedure to estimate the genotype-calling  
157 error as a function of base-calling error and read depth, and used it to determine cutoffs on read  
158 depth for data filtering.

159 We used the raw sequencing data from six *Heliconius* species in the *erato-sara* clade and an  
160 outgroup (*H. melpomene*) (Table S1), previously generated by Edelman et al. (2019). Sequencing  
161 reads were filtered for Illumina adapters using cutadapt v1.8.1 (Martin, 2011) and then mapped to  
162 the chromosome-level genome assembly of *H. erato demophoon* v1 available from lepbase.org,  
163 using BWA mem v0.7.15 (Li 2013) with default parameters and marking short split hits as secondary.  
164 Mapped reads were sorted and duplicate reads removed using sambamba v0.6.8 (Tarasov et al.  
165 2015). Realignment around indels was performed with the Genome Analysis Toolkit (GATK) v3.8  
166 *RealignerTargetCreator* and *IndelRealigner* modules (McKenna et al. 2010; DePristo et al. 2011), in  
167 order to reduce the number of indel miscalls. Read depth and other relevant read alignment quality  
168 control metrics were computed using QualiMap v2.2.1 (Okonechnikov et al. 2016).

169 Genotype calling was performed on each individual separately with bcftools v1.5 (Li et al. 2009)  
170 *mpileup* and *call* modules (Li 2011), using the multiallelic-caller model (*call -m*) and requiring a  
171 minimum base and mapping quality of 20. Genotype calls were filtered using the bcftools *filter*  
172 module. Both invariant and variant sites were required to have a minimum quality score (QUAL) of  
173 20. Furthermore, we required that each genotype had a genotype quality score (GQ)  $\geq 20$  and a read  
174 depth (DP) satisfying  $\max(1/2 * \text{meanDP}, 20) \leq \text{DP} \leq 2 * \text{meanDP}$  where meanDP is the average read  
175 depth of the sample. The meanDP-based filters were used to reduce erroneous calls when the read  
176 depths were too low or too high from the sample average, accounting for variation of sequencing  
177 depths across individuals. The  $\text{DP} \geq 20$  filter was chosen to minimize genotyping error rates (see next  
178 section) while retaining a sufficiently large number of loci across the genome. At our estimated  
179 base-calling error ( $\sim 0.1\%$ ), this filter achieved the genotype-calling error of  $< 0.05\%$  (see next section)  
180 (Fig. 1, Tables S2–S3). For the female Z chromosome, we used  $\text{DP} \geq 10$  instead since only one  
181 chromosome copy was present. All genotypes that did not fulfill these requirements or were located  
182 within 5-bp of an indel were recoded as missing data.

183

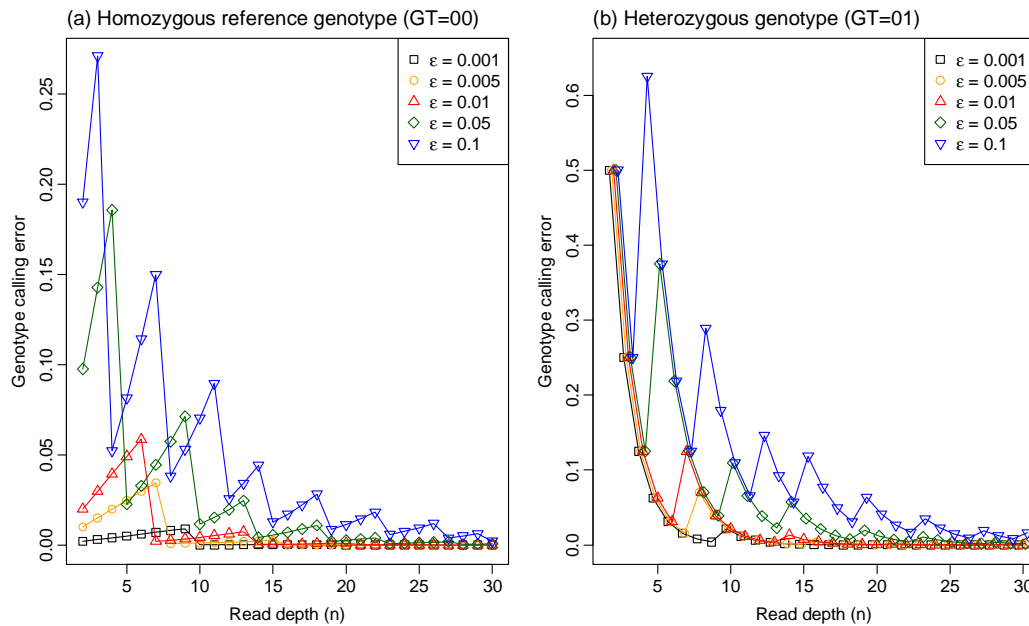

184

185 **Figure 1.** The genotype-calling error rate for a given base-calling error ( $\epsilon$ ) and read depth ( $n$ ) when  
186 the true genotype is (a) a homozygote for the reference allele (GT = 00) or (b) a heterozygote (GT =  
187 01). Note that the genotype-calling error does not decrease monotonically with the increase in  $n$   
188 when  $\epsilon$  is fixed, or with the reduction in  $\epsilon$  when  $n$  is fixed. The calculation is performed using a C  
189 program written by Z.Y. that implements the ML method of Li (2011) and calculates its error rate.

190

### 191 *Analysis of base-calling and genotype-calling error rates to guide data compilation*

192 The base-calling error rate was estimated from the proportion of non-matching bases in  
193 homozygous genotype calls from reads mapped to the *H. melpomene* reference genome, which was  
194 more complete than the *H. erato demophoon* reference. Only positions with homozygous genotype  
195 calls with read depth (DP)  $\geq 50$  were retained. Because mapping errors can bias our estimates of  
196 base-calling error rate, sites overlapping repetitive regions were excluded. For sites passing those  
197 filters, we recorded the read depth (DP) and the number of reads supporting each of the reported  
198 alleles (AD), with the difference to be the number of erroneous base calls. The base-calling error  
199 was calculated as the ratio of the number of erroneous base calls over the read depth, both summed  
200 across all sites passing filters. The calculation was done for homozygous reference genotype (GT =  
201 00) and homozygous alternative genotype (GT = 11).

202 We then analyzed the genotype-calling error rate to determine a suitable cutoff for the read depth,  
203 following the maximum likelihood (ML) method for genotype-calling of Li (2011). The results were  
204 used to guide our choice of the filter (DP  $\geq 20$ ), to achieve a genotype-calling error of  $<0.05\%$ .

205 Given the base-calling error rate ( $\epsilon$ ) and the read depth ( $n$ ), the genotype-calling error rate ( $e$ ) can be  
206 calculated by following the ML procedure of genotype calling of Li (2011). Here we assume that  $\epsilon$  is  
207 the same among the reads and is independent of the true base. Given the data of  $k$  1s and  $(n - k)$  0s  
208 among the  $n$  reads, the likelihoods for the three genotypes (GT = 00, 01, and 11) are given by the  
209 binomial probabilities as

$$\begin{aligned}
 L(00|k) &= \Pr(k|GT = 00) = \binom{n}{k} (1-\epsilon)^{n-k} \epsilon^k, \\
 L(01|k) &= \Pr(k|GT = 01) = \binom{n}{k} \left(\frac{1}{2}\right)^n, \\
 L(11|k) &= \Pr(k|GT = 11) = \binom{n}{k} (1-\epsilon)^k \epsilon^{n-k}
 \end{aligned}
 \tag{1}$$

(Li 2011). The genotype achieving the highest likelihood is the called (inferred) genotype. The genotype-calling error is an average over the possible read outcomes (i.e., over  $k = 0, \dots, n$ )

$$\begin{aligned}
 e_{GT=00} &= \sum_{k=0}^n \Pr(k|GT = 00) \times I_{GT \neq 00}, \\
 e_{GT=01} &= \sum_{k=0}^n \Pr(k|GT = 01) \times I_{GT \neq 01},
 \end{aligned}
 \tag{2}$$

where the indicator  $I_{GT \neq 00}$  is 1 if the called genotype (from data  $k$ ) is not 00 (in error) and 0 otherwise, and  $I_{GT \neq 01}$  is defined similarly.

216

### 217 *Multilocus datasets for BPP and 3s analyses*

218 We prepared two sets of data, one for BPP analyses (under the MSC and MSci models) and the other  
 219 for 3s analysis (under the IM model). The 'BPP dataset' has six species in the *erato-sara* clade. The  
 220 '3s dataset' has an extra species, *H. melpomene*, as an outgroup (**Table S1**). Both datasets were  
 221 prepared in the same way. For each dataset, we defined coding and noncoding regions based on the  
 222 gene annotation of *H. erato demophoon* v1 reference assembly. For the noncoding regions, we  
 223 extracted the genotype calls for small genomic segments, referred to as loci, with sizes between 100  
 224 and 2,000 bp, and with the further requirement that any two consecutive loci must be at least 2,000  
 225 bp apart. This minimum spacing was used in previous analyses of *Drosophila* genomic datasets  
 226 based on estimated recombination rates and was found to produce similar results to the use of  
 227 larger spacing such as 10 kb (Wang and Hey 2010; Dalquen et al. 2017). For each locus, we produced  
 228 sequence alignments from the genotype calls, with heterozygotes represented using IUPAC codes  
 229 (with Y for T/C, say). We removed sites with missing genotypes and sites overlapping with repetitive  
 230 regions (based on the repeat annotation of *H. erato demophoon* v1 reference assembly, available at  
 231 <http://download.lepbase.org/v4/repeatmasker/>). Loci with  $\leq 10$  sites after processing or with  $> 50\%$   
 232 gaps were excluded. For the coding regions, the same filters were applied except that there was no  
 233 maximum locus size. There were 74,999 coding loci (median length of 165 and median informative  
 234 sites of 3) and 92,966 noncoding loci (median length of 237, median number of informative sites of  
 235 5).

236

### 237 *Inferring species divergence history across the genome using multispecies coalescent model* 238 *(BPP A01 analysis)*

239 We inferred species trees using Bayesian inference under the MSC model implemented in BPP v4.3.0  
 240 (Yang and Rannala 2014; Rannala and Yang 2017; Flouri et al. 2018). This A01 analysis under the  
 241 MSC accounts for deep coalescence and the resulting gene tree heterogeneity along the genome but  
 242 assumes no gene flow. We analyzed autosomes and the Z chromosome separately and coding and  
 243 noncoding regions of autosomes separately, with four sets of data in total (**Table S4**). Two inversion  
 244 regions in chromosomes 2 and 15 were analyzed separately, denoted 2b and 15b, respectively. The  
 245 2b region included part of the Herato0211 scaffold (from position 1434133) and the whole scaffolds  
 246 Herato0212, Herato0213 and Herato0215 (a total of 1.95 Mb). The 15b region corresponded to  
 247 Herato1505:1977997–2558395 (580 kb), which included the *cortex* gene (Herato1505:2074108–

248 2087841, ~13.7 kb). Thus, there were 25 chromosomal regions in total (for 21 chromosomes, with  
249 chromosomes 2 and 15 split into three regions).

250 For each of the four sets, we grouped the loci into blocks of 100 loci and inferred the species tree for  
251 the block (**Table S4**). This block size was large enough for the inferred species tree to achieve high  
252 posterior support and small enough to allow for the local introgression history to be reflected in the  
253 inferred species tree history. The choice also allowed for at least two blocks for each chromosome  
254 region. Any final blocks of each chromosomal region with fewer than 40 loci were discarded due to  
255 limited information. To assess the impact of block size, we repeated the analysis using blocks of 200  
256 loci. While the neutral coalescent process may be expected to be largely homogeneous across the  
257 genome, the introgression rate is expected to be highly variable, due to selective removal of  
258 introgressed alleles, affected by the strength of selection, local recombination rate, etc. The analysis  
259 using blocks of loci can thus capture the variation across the genome due to differential rates of  
260 gene flow.

261 We assigned diffuse inverse gamma priors to the root age  $\tau_0$  and population size parameters ( $\theta$ ) with  
262 the means to be close to rough estimates from the data in preliminary runs. We used  $\theta \sim \text{InvG}(3,$   
263  $0.04)$ , with the mean  $0.04 / (3 - 1) = 0.02$  for all populations. For divergence times, we used  $\tau_0 \sim$   
264  $\text{InvG}(3, 0.06)$  for the coding loci and  $\tau_0 \sim \text{InvG}(3, 0.12)$  for the noncoding loci. Given  $\tau_0$ , divergence  
265 times at other nodes of the species tree were generated from a uniform-Dirichlet distribution (Yang  
266 and Rannala 2010, eq. 2). Population-size parameters ( $\theta$ ) are integrated out analytically to improve  
267 mixing of the MCMC in the A01 analysis of species tree estimation (Yang 2015).

268 The MCMC was run for  $2 \times 10^6$  iterations after a burn-in of  $10^5$  iterations, with samples taken every 20  
269 iterations. The same analysis of each block is repeated ten times using different starting species  
270 trees, and consistency among runs is used to assess convergence of the MCMC. Non-convergent  
271 runs were discarded. The samples were then combined to produce the posterior summary such as  
272 the maximum a posteriori (MAP) tree.

273

### 274 *Exploring gene flow scenarios using the IM model for species triplets (3s analysis)*

275 In order to formulate hypotheses about gene flow between species, we attempted to use several  
276 heuristic methods, including PHYLONET/MCMC\_SEQ using sequences (Wen and Nakhleh 2018),  
277 PHYLONET/ML (Yu et al. 2014), and SNaQ in PHYLONETworks (Solís-Lemus et al. 2017), the latter two  
278 using estimated gene trees as input data. Our attempts were not successful. Different runs of those  
279 programs inferred different network models, which in general did not appear to be reliable, with  
280 apparently spurious introgression events around the root of the species tree.

281 Instead we used the maximum likelihood program 3s (Dalquen et al. 2017) to estimate migration  
282 rates between all pairs of species. This implements the IM model for three species  $S_1$ ,  $S_2$  and  $S_3$ ,  
283 assuming the species tree  $((S_1, S_2), S_3)$ , and accommodates both deep coalescence and migration.  
284 While limited to three species and three sequences per locus, it can be applied to large datasets with  
285  $>10,000$  loci. Gene flow is allowed between the two ingroup species only ( $S_1$  and  $S_2$ ) while the third  
286 species ( $S_3$ ) is used as an outgroup to improve parameter estimation and the power of the test  
287 (Dalquen et al. 2017). *H. melpomene* was used as an outgroup for all pairs. The outgroup species  
288 was added to the dataset by mapping it to the *H. erato demophoon* reference genome.

289 We analyzed coding and noncoding regions separately and the autosomal loci and the Z  
290 chromosome separately, but treated all loci in each chromosomal region as one dataset (rather than  
291 breaking them into blocks of 100 or 200 loci) (**Table S4**). We also performed an analysis that used all  
292 autosomal loci. Since the sequences were unphased and 3s requires phased haploid sequences, we  
293 first phased the loci using PHASE v2.1.1 (Stephens et al. 2001), resulting in two phased haploid

294 sequences per individual. In the simulations of Huang et al. (2021), which examined the Bayesian  
295 method BPP, this approach of computational phasing produced very small biases, and the same may  
296 be expected to apply to the ML method implemented in 3s. The 3s program uses three sequences  
297 but allows multiple sequences per species. For each locus, we sampled three sequences of  
298 configurations 123, 113 and 223 with probabilities 0.5, 0.25 and 0.25, respectively. Here, 123 means  
299 one sequence from each species, etc.

300 Each dataset was analyzed using 3s to fit two models: MSC without migration (M0) and MSC with  
301 migration (M2; isolation-with-migration or IM). Model M0 involves two divergence time parameters  
302 ( $\tau_1$  and  $\tau_0$ ) and four effective population sizes ( $\theta_1$  and  $\theta_2$  for species  $S_1$  and  $S_2$ ,  $\theta_4$  for the root, and  $\theta_5$   
303 for the ancestor of  $S_1$  and  $S_2$ ), while M2 involves in addition two migration rates  $M_{12}$  and  $M_{21}$ . Here  
304  $M_{12}$  is the expected number of migrants from species  $S_1$  to  $S_2$  per generation. Each ML analysis was  
305 repeated ten times, and the run with the highest log-likelihood value was used. The two models (M0  
306 and M2) were compared using a likelihood ratio test (LRT), with  $\chi^2_2$  used as the null distribution.  
307 Only gene flow scenarios that passed the LRT at the 1% level were considered later.

308 Evidence for pairwise gene flow from the 3s analysis was used together with the inferred species  
309 trees from the previous BPP A01 analysis of blocks of loci to generate a species tree model with  
310 introgression (MSci model). There were two difficulties in this approach. First, IM (3s) and MSci  
311 (BPP) are two extreme versions of models of gene flow and both may be too simplistic to fit the real  
312 data. The IM model assumes continuous gene flow between species  $S_1$  and  $S_2$  since their split, and  
313 may be unrealistic for many of the species pairs, for example, if gene flow occurred immediately  
314 after species split but then stopped as the two species became more diverged. This is particularly  
315 the case as a branch in the 3-species tree used in the 3s analysis may represent multiple branches in  
316 the full tree for all six species. The MSci model instead assumes episodic introgression events at  
317 specific time points. Our expectation is that if introgression is episodic, the LRT based on the  
318 continuous IM model will still detect gene flow, but with distorted parameter estimates. The  
319 opposite may be true as well: if gene flow is continuous as in the IM model, fitting the MSci model  
320 will give distorted parameter estimates (Jiao et al. 2020). Second, the LRT suggested significant  
321 evidence for gene flow between most pairs of species. We prioritized introgression edges that could  
322 reconcile the different species trees across the genome from the previous BPP analysis under the  
323 MSC model. We also took a parsimonious approach of minimizing the number of introgression  
324 events by assuming gene flow only if the model of no gene flow cannot explain the data: if the LRT  
325 suggested gene flow between most of their descendant species, we placed introgression edges  
326 between the ancestral populations.

327

### 328 *Estimation of parameters for species divergence and cross-species introgression (BPP A00* 329 *analysis under MSci)*

330 Given a species tree model with introgression, we ran BPP v4.3.0 (Flouri et al. 2020) to estimate the  
331 population sizes ( $\theta$ ), species divergence times ( $\tau$ ) and introgression probabilities ( $\phi$ ). An inverse-  
332 gamma prior,  $\text{InvG}(3, 0.01)$ , with mean 0.005, was assigned to  $\theta$ . The prior for  $\tau_0$  was  $\text{InvG}(3, 0.04)$ .  
333 The priors for  $\phi$  were  $\text{beta}(4, 2)$ , with mean 0.75. Initial values of  $\phi$  were set to 0.8 or 0.9. These  
334 prior settings were based on rough estimates from preliminary runs. We also considered alternative  
335 priors for  $\theta$  (e.g. gamma distributions) and  $\phi$  (e.g.  $\text{beta}(1,1)$ ) to assess the stability of the posterior  
336 estimates when mixing and convergence were of concern. We performed inference for each of the  
337 25 chromosomal regions, using either all coding or noncoding loci in each region (Table S4).

338 The MCMC was run for  $10^6$  iterations, sampling every 100 iterations, after a burn-in of  $10^6$  iterations.  
339 Ten independent runs were performed and convergence was assessed by examining consistency  
340 between runs. Non-convergent runs were discarded. For models with a label-switching



341 unidentifiability issue (Flouri et al. 2020), the MCMC samples were post-processed before they were  
342 combined for posterior summaries.

343

## 344 RESULTS

### 345 *Analysis of base-calling and genotype-calling error rates to guide data compilation*

346 We processed the raw reads from the whole-genome re-sequencing data of Edelman et al. (2019)  
347 for six *Heliconius* species from the *erato-sara* clade: *H. erato demophoon*, *H. himera*, *H. hecalesia*  
348 *formosus*, *H. telesiphe telesiphe*, *H. demeter* and *H. sara magdalena* (Table S1). To guide our  
349 compilation of the unphased loci, we estimated the base-calling error rate in the genomic data and  
350 analyzed the genotype-calling error. The base-calling error was calculated to be ~0.08% for the  
351 homozygous reference allele and ~0.20% for the homozygous alternative allele, with variation  
352 among individual genomes (Tables S2–S3).

353 Given a base-calling error rate ( $\varepsilon$ ), we calculated the genotype-calling error rate ( $e$ ) for the  
354 homozygous reference genotype (GT = 00) and the heterozygous genotype (GT = 01) by using  
355 equation (2) (Fig. 1). Note that even at a very low base-calling error rate, the genotype-calling error  
356 can be very high, especially at low read depth. Furthermore, the error rate for heterozygotes is  
357 much higher than for homozygotes.

358 Given the read depth  $n$ , the genotype-calling error does not necessarily decrease when  $\varepsilon$  decreases.  
359 For example, when  $n = 7$ , the genotype-calling error for a homozygote (GT=00) is 0.0020 at  $\varepsilon = 0.01$ ,  
360 but rises to 0.0345 when  $\varepsilon$  is reduced to 0.005 (Fig. 1). This is due to the discrete nature of the read  
361 outcome. At  $\varepsilon = 0.01$ , the called genotype is 00 (the truth) when  $k = 0$  or 1, is 01 when  $k = 2-5$  and is  
362 11 when  $k = 6$  or 7, and the genotype-calling error is a sum over  $k = 2, \dots, 7$  (i.e., six out of the eight  
363 cases are in error). In contrast, at  $\varepsilon = 0.005$ , the called genotype is 00 when  $k = 0$ , is 01 when  $k = 1-6$   
364 and is 11 when  $k = 7$ , so that the genotype-calling error is a sum over  $k = 1, \dots, 7$  (i.e., seven out of  
365 the eight cases are in error), and is higher than at  $\varepsilon = 0.01$ . Similarly given  $\varepsilon$ , the genotype-calling  
366 error does not necessarily decrease with the increase of the read depth  $n$  (Fig. 1). For example,  
367 when  $\varepsilon = 0.01$  the genotype-calling error for a homozygote is 0.0199 at  $n = 2$ , but rises to 0.0585  
368 when  $n$  increases from 2 to 6; for those values of  $n$ , genotype-calling error is a sum over  $k = 1, \dots, n$ .  
369 Then when  $n = 7$ , error drops to 0.00269 as the error is a sum over  $k = 2, \dots, n$ . The strong periodicity  
370 in the genotype-calling error is similarly due to the discrete nature of the problem.

371 With the base-calling error estimated at  $\varepsilon \approx 0.001$ , we estimate the genotype-calling error rate to be  
372  $1.1 \times 10^{-6}$  for homozygotes and  $4.0 \times 10^{-4}$  for heterozygotes at the read depth  $n = 20$  (Fig. 1). We  
373 therefore filtered our data for coverage  $n \geq 20$ . Since the read coverage was >60x (Edelman et al.  
374 2019), this caused relatively little dropout.

375

### 376 *Genealogical variation across the genome*

377 We first used BPP to infer species trees under the multispecies coalescent (MSC) model using blocks  
378 of 100 or 200 loci along the genome. There were 749 coding blocks and 933 noncoding blocks over  
379 the 25 chromosomal regions (21 chromosomes with chromosomes 2 and 15 each split into three  
380 regions by an inversion) (Table S4). This is the BPP A01 analysis of Yang (2015), which explicitly  
381 accounts for deep coalescence but ignores gene flow. Ten species trees were the best estimate (i.e.,  
382 the maximum *a posteriori* probability tree or MAP tree) in at least one block (Fig. 2, Tables S5–S7).  
383 These are referred to as trees i-x. Trees i and ii accounted for over 95% of the blocks. These two  
384 trees differ only in the position of *H. hecalesia* within the *erato* clade: in tree i, *H. hecalesia* is sister

385 to *H. telesiphe* while in tree ii, it is sister to the clade (*H. erato*, *H. himera*).

386

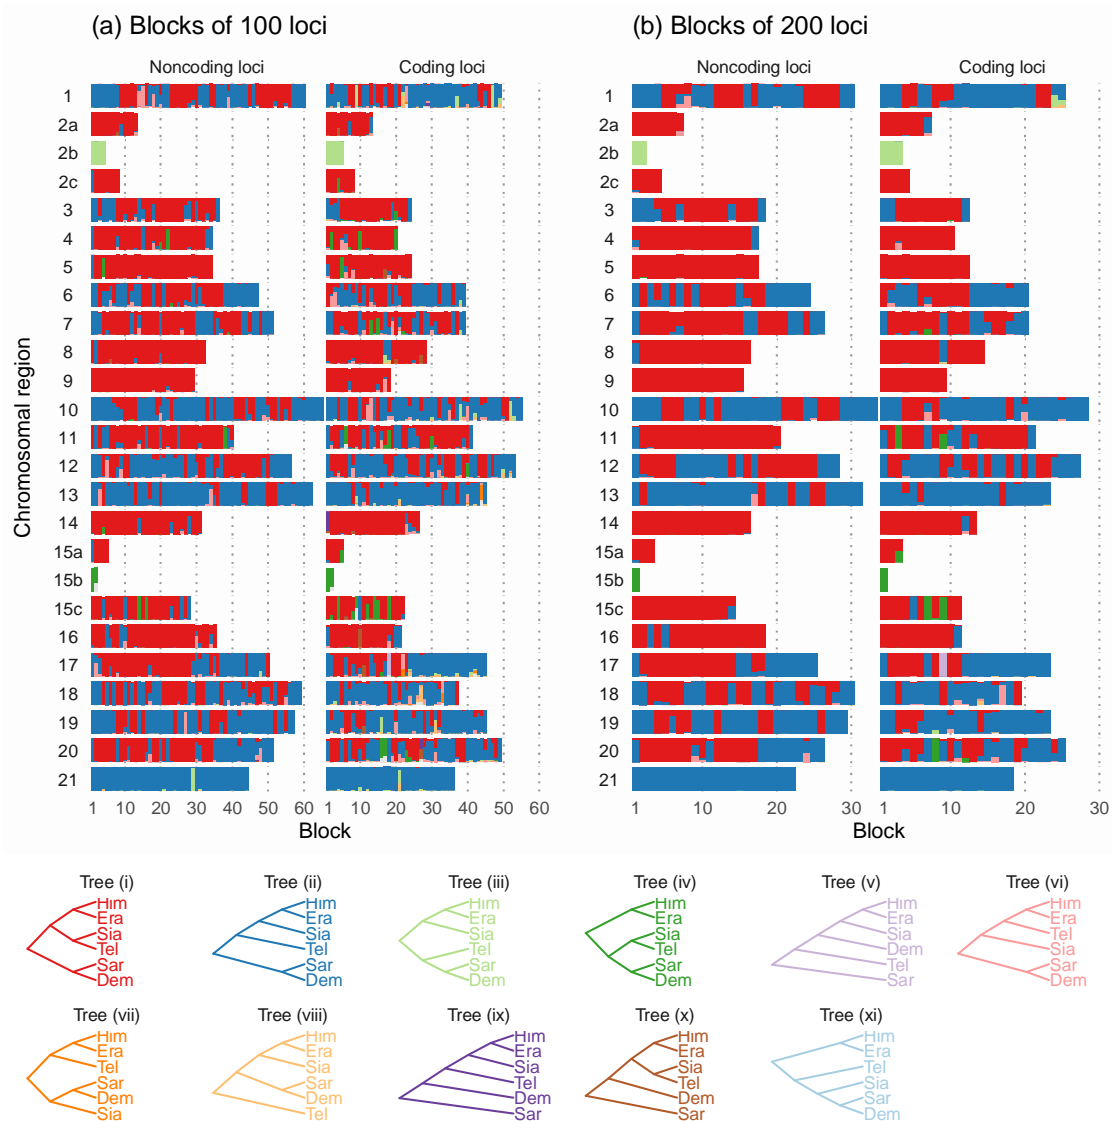

387

388 **Figure 2.** Posterior probabilities of species trees from BPP analysis of (a) blocks of 100 loci and (b)  
 389 blocks of 200 loci across the genome (Table S2) under the MSC model without gene flow. The y-axis  
 390 represents the posterior probability and ranges from 0 to 1. Trees (i)–(x) in the legend are MAP  
 391 trees in at least one block. Tree (xi) appeared as one of the top eight trees in the sliding-window  
 392 analysis of Edelman et al. (2019) but not in our analysis. Tree colours match those in Edelman et al.  
 393 (2019) (their Fig. 2). Era: *H. erato*, Him *H. himera*, Sia: *H. hecalesia*, Tel: *H. telesiphe*, Dem: *H.*  
 394 *demeter*, Sar: *H. sara*.

395

396 The species trees estimated in this analysis are expected to reflect the history of species divergences  
 397 as well as cross-species introgression, and the major cause of the differences among the blocks is the  
 398 variable rate of gene flow along the genome. The use of 100 or 200 loci in each block helps to filter  
 399 out stochastic fluctuations in the coalescent process. The results were highly consistent between

400 the two choices of the block size and between coding and noncoding loci (**Fig. 2**). Such consistencies  
401 suggest that the patterns revealed in the analysis are real rather than a result of analytical artefacts.

402 There was some variation in the estimated species trees across the genomic regions. Three regions  
403 in particular had species tree distributions that differed from the rest of the genome: chromosome  
404 21 (Z chromosome), the inversions on chromosomes 2 and 15 (2b and 15b). Chromosome 21 was  
405 the only chromosome for which tree ii is a MAP tree for almost all blocks (**Fig. 2, Table S5**). Among  
406 the autosomal regions excluding inversions, tree ii was the MAP tree in ~40% and 46% of noncoding  
407 and coding blocks, respectively, while the corresponding proportions for tree i were 58% and 47%  
408 (**Table S5**). Thus tree i was the autosomal majority tree. Inversion 2b had an unusual history in  
409 which *H. telesiphe* is more closely related to the *sara* clade (tree iii). In this inversion region, *H.*  
410 *erato*, *H. himera* and *H. hecalesia* share a derived inverted rearrangement relative to *H. melpomene*,  
411 *H. sara* and *H. demeter* (Van Belleghem et al. 2017; Davey et al. 2017; Edelman et al. 2019),  
412 consistent with trees ii and iii where these species are clustered together. Inversion 15b supported  
413 tree iv in both coding and noncoding regions, in which the (*H. telesiphe*, *H. hecalesia*) clade was  
414 sister to the *sara* clade instead of other members of the *erato* clade as in tree i or ii. This grouping  
415 strongly suggests that *H. telesiphe*, *H. hecalesia*, *H. demeter* and *H. sara* share the derived inverted  
416 rearrangement of this region relative to *H. erato* (Edelman et al. 2019). The 15b inversion contains  
417 the *cortex* gene that controls mimetic wing colour patterning across *Heliconius* species (Nadeau et al.  
418 2016; Van Belleghem et al. 2017). Tree iv also appeared as a MAP tree sporadically in other parts of  
419 the autosomes, sometimes with high posterior probabilities (**Fig. 2, Table S6**). These include regions  
420 on chromosome 15 outside the inversion as well as on chromosomes 4, 5 and 11.

421

#### 422 *Pairwise gene flow rates*

423 Gene flow among species could reconcile different species trees from the BPP A01 analysis  
424 reported above. We investigated this possibility by explicitly estimating the migration rates  
425 between each species pair under the IM model implemented for species triplets in the program  
426 3s (Zhu and Yang 2012; Dalquen et al. 2017). The model allows migration between the two  
427 ingroup species at constant rates per generation in the two directions, while migration involving  
428 the outgroup is not allowed. We used *H. melpomene* as an outgroup in all triplets for parameter  
429 estimation.

430 We found evidence of bidirectional gene flow between *H. telesiphe* and *H. hecalesia*, consistent  
431 with a scenario in which tree i (autosome-majority tree) and tree ii (Z chromosome tree) are  
432 related through introgression between the two species (**Figs. 3, 4, 5**). However, gene flow  
433 between these species was detected only for autosomal loci (both coding and noncoding) and not  
434 on the Z chromosome (**Fig. 3**). The results suggest that the prevailing topology on the Z  
435 chromosome, tree ii rather than tree i, is the true species tree. In particular, we found no  
436 evidence of gene flow in 3s analyses from *H. erato* and *H. himera* towards *H. hecalesia*-(**Fig. 3**),  
437 which is necessary to explain tree ii as a result of introgression if tree i were the true species tree.  
438 We note that in other systems, such as *Heliconius melpomene* and *H. cydno* (Martin et al. 2019)  
439 and *Anopheles* mosquitoes (Thawornwattana et al. 2018), the sex chromosome was also less  
440 prone to gene flow. In addition, in the BPP analysis under the MSci model to be discussed in detail  
441 later, there is only very weak introgression ( $1 - \phi_c < 10\%$ ) from *H. telesiphe* to *H. hecalesia* on the  
442 Z and almost none for the 2b inversion (**Figs. 5, 6**). Together, these results suggest that tree ii  
443 most likely reflects the true species history while tree i is the result of cross-species introgression.

444 Given tree ii, the Z chromosome, particularly among noncoding loci, was almost devoid of gene  
445 flow, in sharp contrast with the autosomes (**Fig. 3, Table S8**). For the autosomes, the highest  
446 rates of migration were between the two sister species *H. erato* and *H. himera*, with gene flow  
447 occurring in both directions (at the rate of 0.085–0.121 migrants per generation from *H. himera*

448 to *H. erato* and 0.048–0.067 in the opposite direction) (**Fig. 3**). According to 3s results, there was  
 449 gene flow into *H. erato*, *H. himera* and *H. demeter* from every other species, and gene flow from  
 450 *H. sara* to all other species. These results were largely consistent among the individual  
 451 autosomes (**Fig. S1**), across pairs of species (**Fig. S2**) and with an independent Bayesian analysis of  
 452 the 3s datasets under the same model using GPhocs (Gronau et al. 2011) (**Fig. S3**).

453 The pattern of gene flow inferred using 3s may reflect complex introgression in this group of  
 454 species as well as the difficulty of using pairwise migration rates to reconstruct the full migration  
 455 history for all species. If gene flow involved ancestral branches on the tree for all six species, we  
 456 would expect the LRT to detect it in multiple pairs of species, although with distorted estimates of  
 457 times and rates of migration. One scenario is extensive introgression involving common  
 458 ancestors of the *sara* group and the *erato* group, which should show up as initial migration after  
 459 species divergence that ceased after a certain time.

460 We used the results from the previous two analyses (BPP A01 and 3s) to formulate a plausible  
 461 history of species divergences and cross-species introgression for the *erato-sara* clade. The Z  
 462 chromosome tree from the BPP A01 analysis was used as the backbone, onto which 3s-supported  
 463 introgression events were added to reconcile other species trees from the bpp A01 analysis. The  
 464 result is shown in **Figure 4**.

465

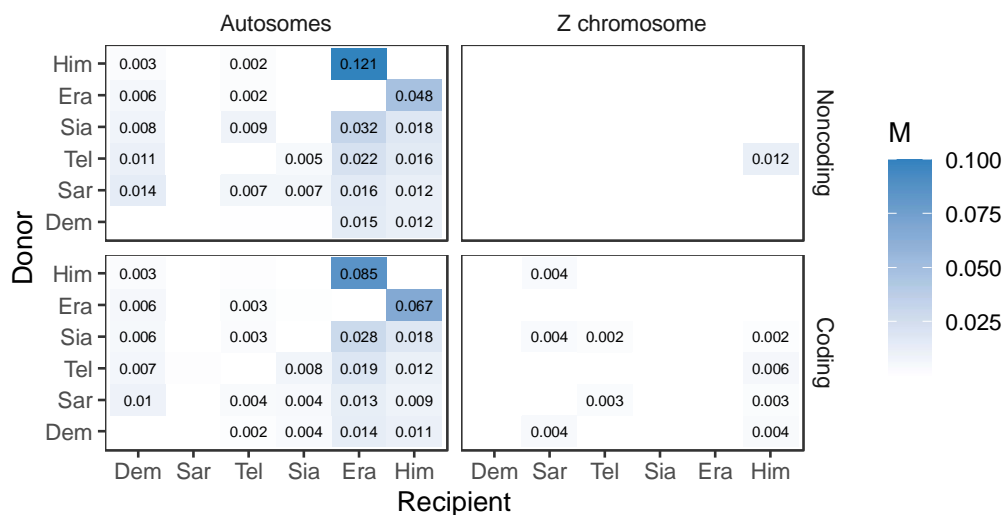

466

467 **Figure 3.** Maximum-likelihood estimates of the pairwise migration rate ( $M = Nm$ ) under the IM  
 468 model from 3s using all coding and noncoding loci in the autosomes (left column) and in the Z  
 469 chromosome (right column; see **Table S4** for the number of loci) for each pair of species. The donor  
 470 and recipient species of gene flow are given in the y- and x-axis, respectively. *H. melpomene* was  
 471 used as an outgroup. Only significant migration rate estimates (by likelihood ratio test at  $p < 0.01$ )  
 472 larger than 0.001 are shown. See **Figure S2** and **Table S8** for estimates of other parameters.

473

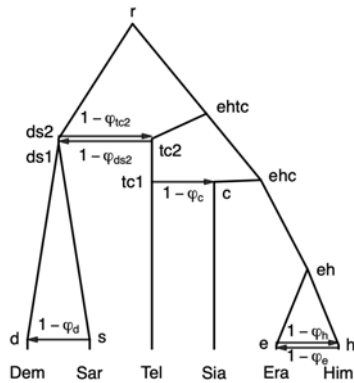

474

475 **Figure 4.** Proposed introgression model based on the BPP species tree estimation under MSC and 3s  
 476 analysis under the IM model. Each horizontal arrow represents a unidirectional introgression event.  
 477 Branch lengths represent posterior means of divergence/introgression times in the BPP analysis of all  
 478 6,030 noncoding loci in chromosome 1. Estimates for other chromosomal regions are in **Figures 5**  
 479 and **S4**. Note that the introgression probability  $\phi_d$  from *H. sara* to *H. demeter* was estimated to be  
 480 zero in all chromosomal regions under this model (**Fig. 5**).

481

#### 482 *Construction of a full history of species divergences and cross-species introgression*

483 We then used the species-tree model with introgression of **Figure 4** to fit the MSci model to  
 484 estimate introgression probabilities ( $1 - \phi$ ), population size parameters ( $\theta$ ) and species  
 485 divergence/introgression times ( $\tau$ ). (Note: in the version of BPP used,  $\phi$  is the backbone inheritance  
 486 probability and  $1 - \phi$  is the corresponding introgression probability). All coding loci are analyzed as  
 487 one dataset for each chromosomal region, as are all noncoding loci. These correspond to A00  
 488 analysis under MSci in BPP (Flouri et al. 2020).

489 Estimates of introgression probability from *H. telesiphe* into *H. hecalesia* were consistently high ( $1 -$   
 490  $\phi_c > 0.5$ ,  $\sim 0.8$  on average) across the genome, except for the 2b inversion region and Z chromosome  
 491 (**Figs. 5–6**). The time estimates suggest that this introgression occurred almost immediately after *H.*  
 492 *hecalesia* split from the common ancestor of *H. erato* and *H. himera* (**Fig. 6**), supporting the  
 493 hypothesis that *H. hecalesia* is a hybrid species that was generated during a single catastrophic  
 494 event. Even though our model assumed different times for species divergence ( $\tau_{ehc}$ ) and for  
 495 introgression ( $\tau_c$ ), with  $\tau_{ehc} > \tau_c$  (equivalent to model B in Flouri et al. (2020), posterior estimates  
 496 strongly suggest that those two times actually coincided, with  $\tau_{ehc} \approx \tau_c$  (equivalent to model C in  
 497 Flouri et al. (2020). This pattern was consistent with our estimates of the species trees from the  
 498 blocks of loci (BPP A01 analysis; **Fig. 2**) where the autosomes, with an exception of the 2b region,  
 499 were dominated by tree i as a result of *H. telesiphe*  $\rightarrow$  *H. hecalesia* introgression on tree ii.

500 For the more ancient introgression between *H. telesiphe* and the common ancestor of *H. demeter*  
 501 and *H. sara*, the estimated introgression probability from *H. telesiphe* ( $1 - \phi_{ds2}$ ) was substantial  
 502 across the entire genome,  $\sim 0.3$ – $0.4$  on average, with  $1 - \phi_{c2} \approx 0.1$  in the reverse direction (**Fig. 5**,  
 503 **Table S9**). This suggests genome-wide flow between the *erato* clade and the *sara* clade prior to the  
 504 *H. telesiphe*  $\rightarrow$  *H. hecalesia* introgression/hybridization. The estimates of  $\phi_{ds2}$  and  $\phi_{c2}$  in the two  
 505 small inversion regions, 2b and 15b, were more extreme, either very close to 0 or 1, with complex  
 506 identifiability issues. We discuss the introgression history of the two inversion regions below.

507 Other introgression events had relatively low probabilities across the genome despite evidence from  
 508 the 3s analysis under the IM model. The bidirectional gene flow between *H. erato* and *H. himera*  
 509 had probabilities of  $1 - \phi_h \approx 15\%$  for *H. erato*  $\rightarrow$  *H. himera* and  $1 - \phi_e \approx 5\%$  for *H. himera*  $\rightarrow$  *H. erato*,

510 consistently throughout the genome (**Fig. 5**). Note that the introgression probability in the MSci  
 511 model is expressed as the proportion of immigrants in the receiving population at the time of  
 512 hybridization, so the smaller rate in the *H. himera* → *H. erato* direction may reflect the large  
 513 population size for *H. erato*. In contrast, the migration rate in the IM model is estimated to be in the  
 514 range of 0.07–0.12 migrants per generation, and is larger in the *H. himera* → *H. erato* direction (**Fig.**  
 515 **3**). We note that there may not be a simple correspondence between the introgression probability  
 516 in the MSci model (BPP) and the migration rate in the IM model (3s); even a small migration rate over  
 517 a prolonged time period may result in a high introgression probability (Jiao et al. 2020). For sister  
 518 species that hybridize today, the IM model of continuous migration may be more realistic than the  
 519 MSci model assuming introgression at isolated time points in the past. The present-day range of *H.*  
 520 *himera* is confined to a small area surrounded by several races of *H. erato*, and it is known that  
 521 hybridization between the two species is ongoing (Mallet et al. 1998). Furthermore, migration rate  
 522 estimates vary considerably across the chromosomes according to both 3s (**Figs. S1 and S2, Table S8**)  
 523 and GPhoCS (**Figure S3**).

524 Lastly, our BPP analysis under the MSci model did not support the *H. sara* → *H. demeter*  
 525 introgression suggested by 3s analysis. The introgression probability ( $1 - \phi_d$ ) was either small (<1%)  
 526 or had a large posterior interval in all chromosomal regions (**Fig. 5**), in either case providing no  
 527 strong support for such introgression.

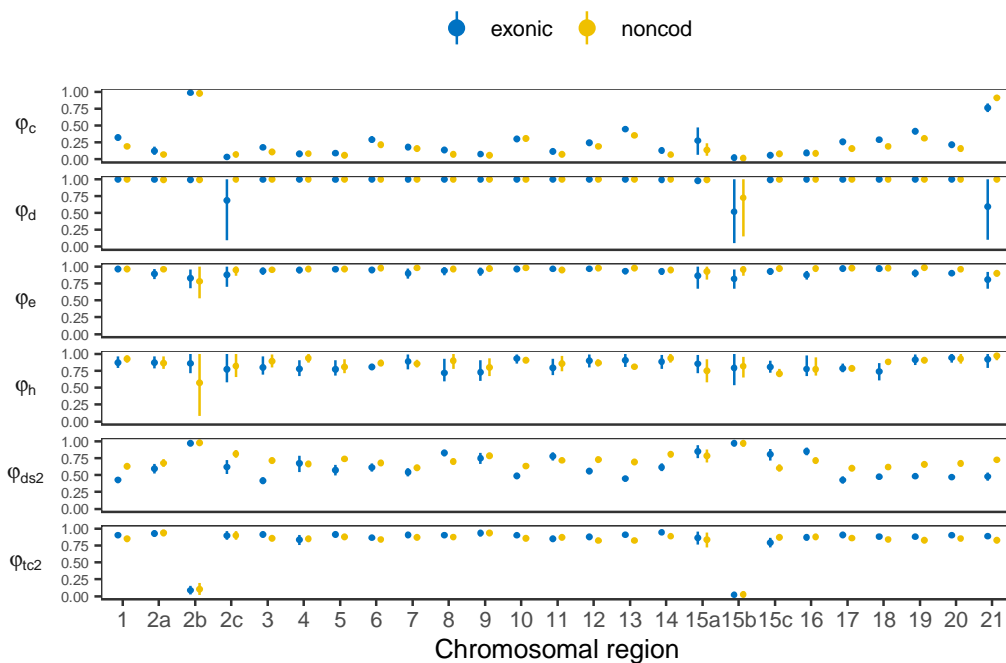

528

529 **Figure 5.** Posterior means (dots) and 95% HPD intervals (bars) of introgression probabilities ( $\phi$ )  
 530 under the MSci model of **Figure 4** obtained using BPP for the 25 chromosomal regions (see **Table S4**  
 531 for the number of loci). Results for other parameters in the model are in **Figure S4**. For 2b and 15b,  
 532 there is an alternative set of posterior estimates resulting from within-model unidentifiability, shown  
 533 in **Figure 7**.

534

535 Overall, estimates of population sizes ( $\theta$ ) and species divergence/introgression times ( $\tau$ ) were  
 536 broadly consistent across most chromosomal regions, as well as between coding and noncoding loci  
 537 (**Figs. 6, S4, S5**). Each chromosomal region with a sufficient number of loci yielded parameter

538 estimates with high precision, and this consistency is an indication of the reliability of the estimates.  
539 The estimates of divergence times were consistently proportional between noncoding and coding  
540 loci, with regression coefficient  $\sim 0.6$  ( $r^2 \geq 0.99$ ) (Fig. S6), suggesting that purifying selection on coding  
541 loci reduced the neutral mutation rate to about 0.6 x that for noncoding loci.

542 The age of the base of the *erato-sara* clade ( $\tau_r$ ) was estimated to be about 0.027 substitutions per  
543 site for noncoding loci on average (Fig. S4, Table S9). If we use the mutation rate of  $2.9 \times 10^{-9}$   
544 neutral mutations per site per generation and 4 generations per year (Keightley et al. 2015), this  
545 translates to about 2.3 million years (Ma) of divergence.

546 Population size parameters ( $\theta$ ) for populations corresponding to short branches on the species tree  
547 (Fig. 4) were difficult to estimate reliably, with considerable variation among chromosomes and with  
548 large posterior intervals (Fig. S4, Table S9), reflecting both low information content for those  
549 parameters and the impact of the heavy-tailed inverse gamma prior. Most populations had  $\theta$  in the  
550 order of 0.01 while a few had more extreme estimates. *H. erato* ( $\theta_{Era}$ ) had small values, in the order  
551 of 0.0001–0.001, for most chromosomes, except in the 2b inversion where the  $\theta_{Era}$  estimates were  
552 unreliable due to lack of data. In the current implementation of the MSci model, the same species  
553 before and after an introgression event are considered distinct species and are assigned  
554 independent  $\theta$  parameters. It appears more sensible to assign the same  $\theta$ , in particular when the  
555 introgression event is inferred to be nonexistent (as in the case of the *H. sara*  $\rightarrow$  *H. demeter*  
556 introgression) and/or to be extremely recent. Thus we believe the estimates of  $\theta$  for the parent  
557 populations prior to introgression events as the population size estimates for the four modern  
558 species: *H. demeter* ( $\theta_d \approx 0.01$ , better than  $\theta_{Dem} \approx 0.002-0.004$ ), *H. sara* ( $\theta_s \approx 0.01$ , better than  $\theta_{sar} \approx$   
559  $0.06-0.13$ ), *H. erato* ( $\theta_e \approx 0.06-0.30$ , better than  $\theta_{Era} \approx 0.0001-0.0166$ ) and *H. himera* ( $\theta_h \approx 0.005-$   
560  $0.017$ , better than  $\theta_{him} \approx 0.0009-0.0022$ ) all for noncoding autosomal loci (Table S9). The genome  
561 sequences of *H. erato* and *H. himera* were obtained from partially inbred individuals to aid assembly,  
562 which likely explains their apparent low effective population sizes and large variation among  
563 chromosomes. The *H. erato* genome in particular has long stretches of homozygosity on some  
564 chromosomes due to inbreeding (Fig. S5) corresponding approximately to the per chromosome  
565 estimates of  $\theta_{Era}$ .

566

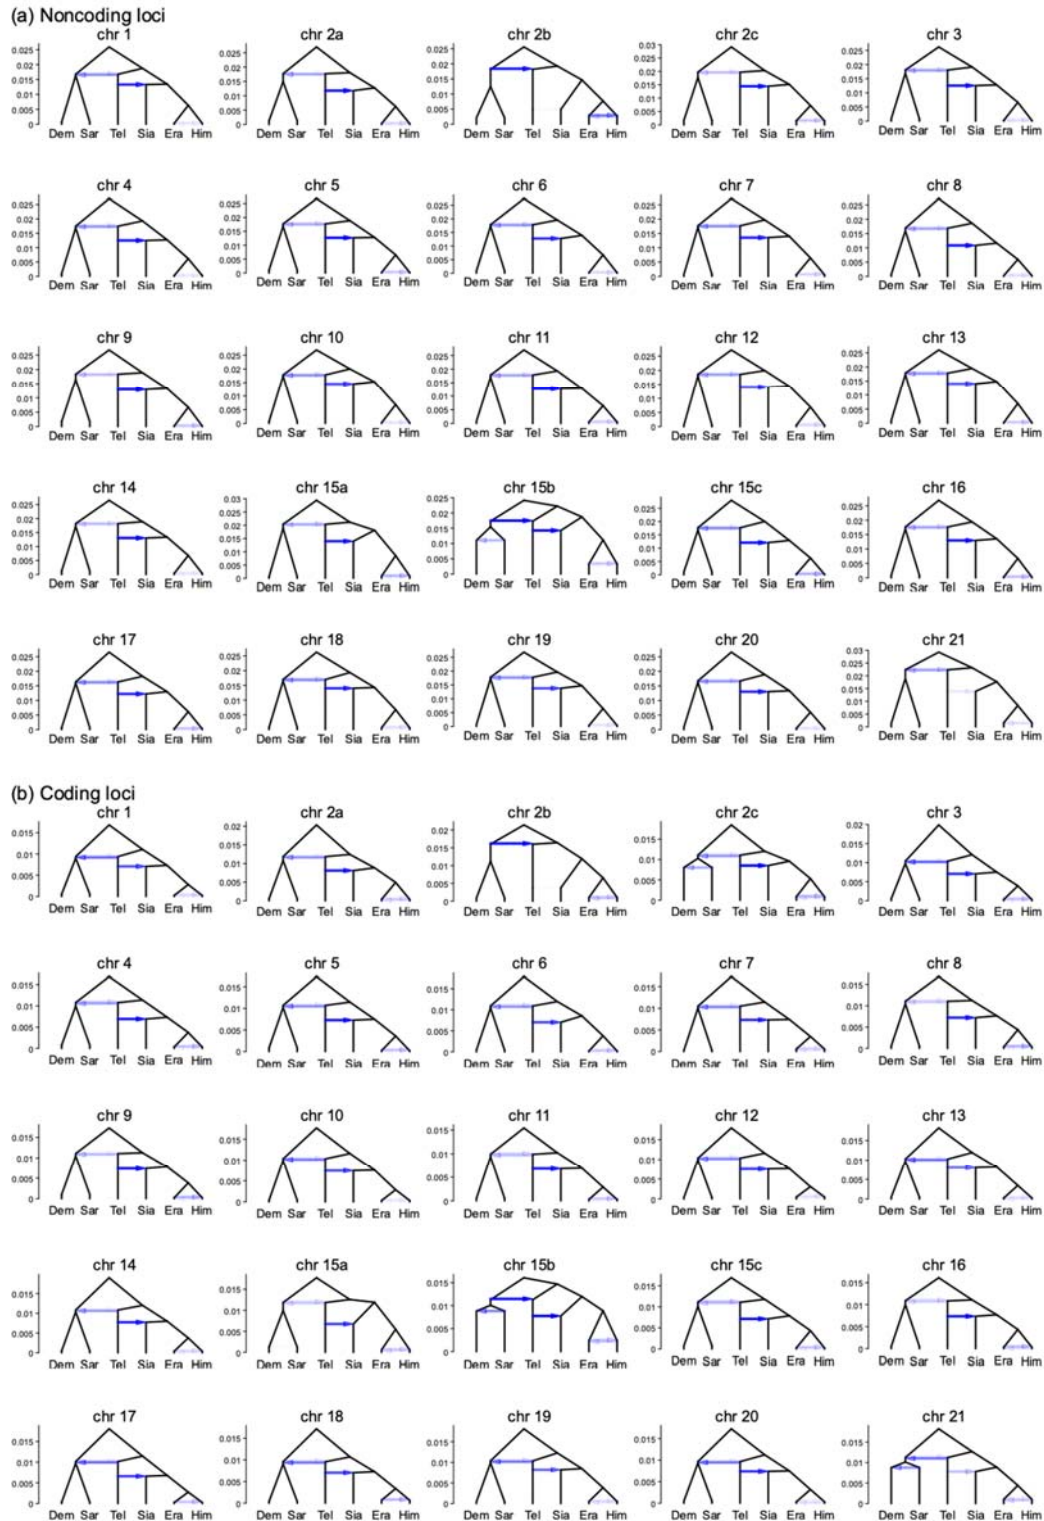

567  
568 **Figure 6.** Estimated introgression history in each chromosomal region obtained from BPP analysis  
569 under the MSci model of **Figure 4** using (a) noncoding and (b) coding loci. Intensity of the horizontal  
570 edges represents the posterior mean of introgression probability, while the y-axis represents the  
571 divergence times in the units of the expected number of mutation per site.



573 DISCUSSION

574 *Major features of the species tree and introgression: comparison with previous studies*

575 In this study, we processed genomic sequences from the *erato-sara* clade of *Heliconius* to compile  
576 unphased diploid sequence alignments, and accommodate unknown phase resolution in the  
577 likelihood calculation. We also assessed the probable genotype calling error rate based on our high  
578 coverage reads and used a high coverage filter to exclude almost all genotype calling errors. We  
579 then used the data to infer the history of speciation and introgression under the MSci model in a full-  
580 likelihood framework. To our knowledge, this is the first phylogenomic study that treats unphased  
581 diploid genomic data properly. The coalescent-based full-likelihood method is an improvement over  
582 summary methods or sliding-window analysis, which do not make proper and full use of information  
583 in the genomic sequence data.

584 In general, our analysis confirms some major conclusions of previous analyses but reveals far more  
585 detail of the evolutionary history of the clade. As in Edelman et al. (2019), we find that the Z  
586 chromosome supports tree ii, while autosomes favour tree i. We weigh the evidence and find that  
587 that the Z chromosomal tree is almost certainly the true species tree (see 'Pairwise gene flow rates'),  
588 even though large-scale introgression has distorted genealogical histories of autosomes so that the  
589 most common gene tree in the genome has a different topology (mostly tree i). Major genealogical  
590 conflicts between the sex chromosome and the autosomes were inferred also in other species  
591 groups including *Anopheles gambiae* (Fontaine et al. 2015; Thawornwattana et al. 2018), felids (Li et  
592 al. 2019) and small finches (Stryjewski and Sorenson 2017). In the *Anopheles gambiae* group of  
593 African mosquitoes, the X chromosomal tree was inferred to be the species tree while the autosomal  
594 tree reflects rampant gene flow (Fontaine et al. 2015; Thawornwattana et al. 2018). However, the  
595 sliding-window analysis of genomic data from the *Anopheles gambiae* group (Fontaine et al. 2015)  
596 led to an incorrect species tree while coalescent-based full-likelihood methods produced a tree more  
597 consistent with chromosomal inversion data and with established patterns of cross-species  
598 hybridization and gene flow (Thawornwattana et al. 2018). In our *Heliconius* dataset, concatenated  
599 windows and MSci analyses led to similar species trees. Concatenation may produce anomalous  
600 gene trees (Roch and Steel 2015) so that the estimated gene tree from large sliding windows may  
601 differ from the species phylogeny, but this was not the case for the *Heliconius* data. In the  
602 *Anopheles gambiae* group, all species arose very rapidly, creating very short internal branches at the  
603 base of the species tree, while the *Heliconius* species studied here are well separated with longer  
604 internal branches (Fig. 4). Thus the sliding-window gene tree approach was more successful in  
605 *Heliconius* than in the *Anopheles gambiae* group. Nevertheless, given the well-known caveats of  
606 sliding-window analysis, it was important to test the previous results.

607 Our improved data and analytical methods also made it possible to conduct more powerful analyses,  
608 answering additional questions. For example, *D* statistics and internal branch length tests (Edelman  
609 et al. 2019) can be used to test for the presence of gene flow, but not to identify gene flow between  
610 sister species, to infer the direction of gene flow, or to estimate its magnitude. In contrast,  
611 migration rate  $M = Nm$  and introgression probabilities  $(1 - \phi)$  are parameters in the IM and MSci  
612 models that provide direct estimates of the magnitude of gene flow. Note that the proportions of  
613 gene trees in sliding-window analyses are not directly comparable with introgression probabilities or  
614 with proportions of block-based species trees across the genome in the BPP A01 analysis.

615 For example, the frequencies of estimated gene trees i and ii in Edelman et al. (2019) are 24.3% and  
616 25.8% among 10kb sliding windows (their Fig. S78), but are 35.5% and 34.8% among the 50kb  
617 windows (mapped to the *H. erato* reference, their Fig. 2B), and 36.4% and 45.4% among the 50 kb  
618 windows (mapped to the more distant *H. melpomene* reference, their Fig. S77). It is easy to see why  
619 the proportion of windows with the dominant gene tree will increase when the window becomes  
620 larger due to the averaging effect of concatenation. Even though the objective of the analysis is to

621 infer the population-level process of species divergences and cross-species introgression, the gene-  
622 tree proportions calculated using sliding windows are affected by this averaging effect as well as  
623 random phylogenetic errors due to a limited window size and coalescent fluctuations in the  
624 genealogical trees. In the BPP A01 analysis under the MSC model, the variation in the rate of cross-  
625 species gene flow (affected by linkage to selected loci and local recombination rate) is expected to  
626 be the most important factor for fluctuations among blocks. Gene-tree conflicts due to ancestral  
627 polymorphisms are filtered out by the MSC model while they contribute to fluctuations among gene  
628 trees in sliding-window analysis. In our BPP A01 analysis, the frequencies of (species) trees i and ii  
629 are 54.8% and 42.8% among the 100-loci noncoding blocks, 44.2% and 48.3% among the 100-loci  
630 coding blocks, 58.9% and 40.2% among the 200-loci noncoding blocks, and 46.9% and 49.5% among  
631 the 200-loci coding blocks. These are reasonably consistent between coding and noncoding loci and  
632 relatively insensitive to the number of loci in each block. There was a somewhat greater  
633 representation of the presumed introgression tree i in noncoding loci (55-59%) than coding loci (44-  
634 47%) and a moderate excess of introgression  $H. telesiphe \rightarrow H. hecalesia$  ( $1 - \phi_c$ ) in noncoding  
635 versus coding loci on each chromosome (Fig. 5). This may reflect greater constraint on introgression  
636 for coding sequences as found in other systems, for instance for Neanderthal ancestry in modern  
637 humans (Sankararaman et al. 2014). In effect, the BPP-estimated species tree variation across the  
638 genome (Fig. 2) approximates history while the concatenated sliding-window analysis includes both  
639 noise and history, which are hard to separate without a proper inference framework.

640 Previous estimates of migration rates and timings in *Heliconius* under models of gene flow such as  
641 the IM model have been limited to a few loci (Bull et al. 2006; Kronforst et al. 2006; Kronforst 2008;  
642 Salazar et al. 2008; Pardo-Diaz et al. 2012) or a few species (Kronforst et al. 2013; Van Belleghem et  
643 al. 2020), most of which have focused on the *melpomene* clade. Using joint site-frequency spectrum  
644 and a secondary contact model, Van Belleghem et al. (2020) estimated migration rates ( $M = Nm$ )  
645 between *H. himera* and two races of *H. erato* (*H. erato favorinus* and *H. erato emma*) to be around  
646 0.5–0.6 migrants per generation from *H. erato* to *H. himera*, and 0.07–0.13 in the opposite direction.  
647 This asymmetric gene flow accords with our MSci results, in which the probability of flow is 15%  
648 from *H. erato* to *H. himera*, and 5% in the opposite direction. Our estimates from the 3s analysis of  
649 the genomic data are 0.05–0.07 migrants per generation from *H. erato* to *H. himera*, and 0.09–0.12  
650 in the opposite direction. The differences may be due to different data and methods used. No  
651 estimates of the other introgression probabilities in Fig. 4 have previously been reported.

652

### 653 *Limitations of our analyses*

654 Implementation of the MSci model in BPP (Flouri et al. 2020) provides a powerful tool for estimating  
655 the timing and magnitude of introgression on a species phylogeny from genome-scale data while  
656 accounting for deep coalescence and genealogical heterogeneity across the genome. The  
657 implementation also retains heterozygous sites in the genomic data and averages over all possible  
658 heterozygote phase resolutions (Gronau et al. 2011), avoiding systematic errors caused by the use of  
659 haploid consensus sequences (Huang et al. 2021). Other likelihood-based methods incorporating  
660 cross-species gene flow are under active development (Hey et al. 2018; Wen and Nakhleh 2018;  
661 Zhang et al. 2018; Jones 2019), but they are computationally demanding and currently impractical  
662 for data of >100 loci. We have also tested for the effects of sequencing error on genotype calls;  
663 erroneous genotype calls may also potentially obscure the genealogical signal in the data. We find  
664 that genotype call error should be very low in our study due to high read coverage (>60x).

665 Here we discuss several limitations of our approach. First, the introgression model we formulated  
666 (Fig. 4) relies on two main sources of information: the variation in the species tree estimated from  
667 blocks of loci across the genome and pairwise migration rate estimates from 3s. Integrating such  
668 information into a single species tree model with introgression is nontrivial. Ideally, we would be

669 able to infer the species phylogeny and introgression events simultaneously with associated  
670 parameters such as introgression and divergence times, but this has yet to be implemented.

671 Second, even with a fixed MSci model (**Fig. 4**), inference of demographic parameters is  
672 computationally challenging. Some parameters were more difficult to estimate reliably, such as  
673 population sizes associated with short branches in the species tree (e.g.,  $\theta_{sar}$ ,  $\theta_e$ , and  $\theta_{ds1}$ ; see **Fig.**  
674 **S4**). Contributing factors include unidentifiability of the model, multimodal posterior distribution,  
675 poor MCMC mixing, and potential model misspecification. The unidentifiability problem arises  
676 because of the symmetry in the likelihood induced by bidirectional introgression (such as the one  
677 between *H. erato* and *H. himera*, or between the ancestor of *H. sara* + *H. demeter* and the ancestor  
678 of *H. telesiphe*) (Flouri et al. 2020). The nature of the unidentifiability in models with many species  
679 and many introgression events can be complex, involving both within-model and cross-model  
680 unidentifiability. The MSci model of **Figure 4** involves two bidirectional introgression events. The  
681 early bidirectional introgression between the ancestor of *H. telesiphe* and the ancestor of *H. sara*  
682 and *H. demeter* yields a pair of unidentifiable models (**Fig. S9**). The bidirectional introgression  
683 between *H. himera* and *H. erato* also leads to a pair of unidentifiable likelihood peaks (not shown).  
684 We prefer species tree  $S_1$  of **Figure S9** because the introgression probabilities  $1 - \varphi_{ds2} < \frac{1}{2}$  and  $1 - \varphi_{tc2}$   
685  $\approx 0.1$ , which appear to be biologically plausible, while the unidentifiable alternative model  $S_2$  has  
686 introgression probabilities  $\varphi_{ds2} > \frac{1}{2}$  and  $\varphi_{tc2} \approx 0.9$  for the horizontal introgression branches, implying  
687 mutual replacements of *H. telesiphe* by the ancestor of *H. sara* and *H. demeter* and the ancestor of  
688 *H. sara* and *H. demeter* by *H. telesiphe*, which does not appear plausible biologically. Similarly the  
689 bidirectional introgression event between *H. erato* and *H. himera* creates a within-model  
690 unidentifiability, with two peaks in the posterior (Flouri et al. 2020), and we focus on the peak with  
691 small introgression probabilities (with  $1 - \varphi_e < \frac{1}{2}$  and  $1 - \varphi_h < \frac{1}{2}$ ) (**Fig. 5**) instead of the alternative  
692 peak of mutual population replacements. We suspect that introgression in those species is likely to  
693 be occurring over extended periods of time rather than at isolated time points due to a certain  
694 catastrophic event (Mallet et al. 2016). The unidentifiability caused by the bidirectional  
695 introgression events is of the label-switching type and is resolved by applying simple constraints such  
696 as introgression probability  $1 - \varphi < \frac{1}{2}$  (Flouri et al. 2020). An example of MCMC outputs and  
697 processing is provided in **Figure S10**. We also note that unidentifiability can occur when the  
698 introgression probability is estimated to be 0 or 1. This is the case for the 2b and 15b inversion  
699 regions; see our discussions of the different inversion scenarios below.

700 Third, we avoided explicit modeling of recombination by analyzing short genomic loci (~200 bp on  
701 average) that are far apart (at least 2 kb), assuming that sites within each locus have zero  
702 recombination, whereas different loci are free to recombine. Sites are expected to be approximately  
703 independent at physical distances of ~10 kb apart, at least based on linkage disequilibrium decay  
704 estimated in the *H. melpomene* group species (Dasmahapatra et al. 2012). Thus, some correlation of  
705 gene genealogies between consecutive loci may be expected. The unrealistic assumption of free  
706 recombination is expected to have a slight effect of exaggerating information content within each  
707 block of loci, leading potentially to artificially narrow credibility intervals for parameter estimates.  
708 The assumption of no recombination among sites of the same locus may be of more concern since  
709 recombination causes different parts of the sequence to have different histories while the model  
710 assumes one history. However, the loci used in this study are so short that the assumption of no  
711 recombination within a locus is expected to hold approximately. Previously Lanier and Knowles  
712 (2012) found that species tree estimation under MSC is robust to realistic levels of recombination.  
713 The impact of recombination on estimates of the migration rate or introgression probability is not  
714 well understood, in particular when recombination rate varies across the genome. Variable  
715 recombination rates as well as variable selective pressures across the genome will differentially  
716 affect the probability that introgressed alleles are accepted in the recipient population, that is, the  
717 rate of gene flow, as found in *Heliconius* (Edelman et al. 2019; Martin et al. 2019) and other  
718 organisms (Burri et al. 2015; Schumer et al. 2018).

719 Fourth, the migration (IM) models in 3s and the MSci model in BPP are necessarily simplified.  
720 Currently we lack a good understanding of the behaviour of our inference methods when the model  
721 of gene flow is misspecified, for example, when the MSci model is fitted to data generated under the  
722 IM model or vice versa (Jiao et al. 2020, Fig. 7). In reality one may expect the magnitude of gene  
723 flow to vary across the genome and over time. It will be interesting to examine the performance of  
724 estimation methods such as 3s and BPP under such complex scenarios of gene flow, and to develop  
725 methods that account for such variation.

726

### 727 *Evidence of introgression from natural populations*

728 Using IM and MSci models, our analyses support three introgression events (Fig. 4): (1) between *H.*  
729 *telesiphe* and the common ancestor of the *sara* clade, (2) from *H. telesiphe* into *H. hecalesia*, and (3)  
730 between *H. erato* and *H. himera*. The first two are consistent with previous genomic studies  
731 (Edelman et al. 2019; Kozak et al. 2021). Ancient introgression such as (1) will be difficult to confirm  
732 using evidence from natural populations today. The recent introgression (3) is well-documented in  
733 natural populations and in mating experiments (Jiggins et al. 1997; Mcmillan et al. 1997; Mallet et al.  
734 2007).

735 However, the six species included in this study constitute but a fraction of the species and  
736 geographic races in the *erato-sara* clade, so caution should be exercised in interpretation of inferred  
737 introgression. In particular, signals of introgression may be indirect, involving related species or  
738 subspecies unsampled in the data.

739 For example, the *H. telesiphe* → *H. hecalesia* introgression inferred from our data may not represent  
740 direct gene flow between the two species. *H. telesiphe* and *H. hecalesia* do not currently overlap  
741 geographically (Rosser et al. 2012). *H. hecalesia* does overlap with *H. clysonymus* and its sister  
742 species *H. hortense* in West Ecuador, the Colombian Andes, and Central America (Rosser et al. 2012),  
743 and there are documented natural hybrids between *H. hecalesia* and both *H. clysonymus* and *H.*  
744 *hortense* (Mallet et al. 2007). Furthermore, *H. telesiphe* forms a well-supported clade with *H.*  
745 *clysonymus* and *H. hortense*, nested within the *erato* clade (Kozak et al. 2015; Massardo et al. 2020;  
746 Kozak et al. 2021). Therefore, it is likely that introgressed loci in *H. hecalesia* actually came from *H.*  
747 *clysonymus*, *H. hortense*, or their common ancestor. Introgression from *H. clysonymus* or *H.*  
748 *hortense* is also supported by a phylogenetic network analysis and *D* statistics in Kozak et al. (2021).

749 Another case is the possible indirect gene flow signal between *H. erato* and *H. himera*. *H. himera* is  
750 considered an incipient species within *H. erato* (*sensu lato*). It is restricted to middle elevations  
751 (800–2,000 metres) of the Andes in South America; in contrast, the subspecies of *H. erato*  
752 characterized here, *H. erato demophoon*, is found in Central America (Rosser et al. 2012). However,  
753 *H. himera* is parapatric with several subspecies of *H. erato* (such as *cyrbia*, *favourinus*, *lativitta* and  
754 *emma*) (Mallet 1993; Rosser et al. 2012), with narrow contact zones where natural hybrids can be  
755 found at frequencies of 5–10% (Jiggins et al. 1996; Jiggins et al. 1997; Mallet et al. 1998). Thus the  
756 introgression signal almost certainly arose from these adjacent subspecies of *H. erato* rather than  
757 from *H. erato demophoon*.

758

### 759 *Introgression history of the two inversion regions*

760 Our analyses consistently suggest that two inversion regions, 2b and 15b, have genetic histories  
761 distinct from the rest of the genome (Figs. 5–6). All introgression probabilities for those two regions  
762 were close to either 0 or 1, except for estimates of  $\phi_h$  and  $\phi_b$  which involve large uncertainties due to  
763 lack of data (Fig. 5). This suggests that loci within each of the two inversion regions were inherited

764 almost without recombination as a single locus. This is likely if an inverted region introgresses and  
765 becomes fixed in a population that previously lacked the inversion (or vice-versa), but that during  
766 the period of polymorphism, recombination in the inverted region was strongly suppressed, which is  
767 a known biological effect of inversions. Although the MSC framework explicitly models ancestral  
768 polymorphism, inversion polymorphism is not accounted for since it creates substructure within the  
769 ancestral population while the model assumes random mating within species and free  
770 recombination among loci. Nonetheless, the result that the probability of introgression is either 0 or  
771 1 is a sensible result. In the MSci model, when introgression probabilities are near the boundary of  
772 the parameter space [0,1], several parameters can become unidentifiable, and different parameter  
773 values corresponding to different introgression histories can explain the data equally well. For each  
774 of the two inversion regions, we identified distinct peaks in the posterior distribution which  
775 correspond to different historical scenarios with opposite introgression directions between (*H. sara*,  
776 *H. demeter*) and *H. telesiphe* (Fig. 7). Both scenarios are consistent with the known inversion  
777 orientations in modern species. Here, we discuss evidence in favour of each introgression scenario,  
778 although it is difficult to rule out alternatives.

779 In the chromosome 2b region (1.95 Mb, with 411 noncoding loci and 516 coding loci), introgression  
780 between the common ancestor of the *sara* clade and *H. telesiphe* was inferred to be unidirectional  
781 with a high introgression probability ( $1 - \phi_{tc2} \approx 0.9$ ,  $1 - \phi_{ds2} \approx 0$ ) in scenario 1 (Fig. 7a). In scenario 2,  
782 introgression was mostly unidirectional but in the opposite direction ( $1 - \phi_{tc2} \approx 0$ ,  $1 - \phi_{ds2} \approx 0.8$ ).  
783 Introgression in either direction is consistent with tree iii (Fig. 2), where *H. telesiphe* clusters with the  
784 *sara* clade and the *H. telesiphe*  $\rightarrow$  *H. hecalesia* introgression was absent ( $1 - \phi_c \approx 0$ ). The two  
785 scenarios make similar predictions about the gene-tree histories and the genetic data (for example,  
786 both scenarios predict the origin of the inversion in the branch leading to ehc), but the effective root  
787 of the species tree for the 2b region is at node r in scenario 1 and at node ehc in scenario 2.

788 To determine which scenario is more consistent with other autosomal regions of the genome, we  
789 compared the root age of the inversion region with  $\tau_r$  and  $\tau_{ehc}$  on other chromosomes. Divergence  
790 times ( $\tau$ ) for the 2b region are highly similar to those in other regions of the genome, with regression  
791 slopes  $\sim 1.01$ – $1.08$  for the noncoding loci (Fig. S7), suggesting that the 2b region has a neutral  
792 mutation rate similar to other genomic regions. Scenario 1 is supported if the root age ( $\tau_r$  in scenario  
793 1,  $\tau_{ehc}$  in scenario 2) for inversion 2b is close to estimates of  $\tau_r$  in other regions, while scenario 2 is  
794 supported if it is closer to  $\tau_{ehc}$  from the rest of the genome. For non-coding loci, the root age of 2b  
795 (posterior mean 0.026) was closer to the root age of the rest of the genome expected under  
796 scenario 1 ( $\tau_r = 0.26$ – $0.29$ ) than that for scenario 2 ( $\tau_{ehc} = 0.018$ – $0.023$ , Fig. S4, Table S9). Although  
797 we do not know whether *H. telesiphe* has the inversion, its ancestor likely had the inversion, but  
798 introgression from the ancestor of *H. demeter* and *H. sara* (which lack the inversion) under scenario  
799 1 caused replacement without recombination. We therefore predict that *H. telesiphe* does not today  
800 carry the inversion, but that its ancestor did. In contrast, scenario 2 predicts that *H. telesiphe* always  
801 lacked the inversion, but it would be unclear why the non-inverted arrangement from *H. telesiphe*  
802 replaced the original non-inverted sequence in the *H. demeter*/*H. sara* ancestor with an almost  
803 complete lack of recombination. Thus this secondary evidence also supports scenario 1 (Fig. 7a).

804 An alternative to an introgression hypothesis requires ancestral polymorphism of the 2b inversion,  
805 where *H. sara*, *H. demeter* and *H. telesiphe* retained the ancestral non-inverted orientation through  
806 incomplete lineage sorting after divergence of the *erato* and *sara* clades (Edelman et al. 2019).  
807 Compared with the introgression scenario, ancestral inversion polymorphism predicts that the  
808 divergence time  $\tau_{tc2}$  for the common ancestor of *H. telesiphe*, *H. sara* and *H. demeter* must pre-date  
809 or overlap the divergence time of the entire clade found for the rest of the genome. Our results did  
810 not support this hypothesis. Estimated  $\tau_{tc2}$  in the 2b region (for non-coding regions, 0.018) was  
811 always much closer to the introgression time in the rest of the genome ( $\tau_{tc2} = 0.016$ – $0.022$ ) than to  
812 the root in the rest of the genome ( $\tau_r = 0.026$ – $0.029$ ) (Fig. S4, Table S9), suggesting that the

813 introgression hypothesis is more likely than the inversion polymorphism hypothesis in the ancestral  
814 population prior to the divergence of the entire *erato-sara* clade.

815 Based on pairwise sequence distances ( $D_{xy}$ ) Edelman et al. (2019) argued that ancestral inversion  
816 polymorphism could explain the data as well as or better than a (*H. sara*, *H. demeter*) → *H. telesiphe*  
817 introgression for inversion 2b (their Fig. S95). The introgression scenario was rejected because the  
818 *H. sara*–*H. telesiphe* divergence of 2b was not much lower than the genome-wide average.  
819 However, this conclusion assumes that all other chromosomes were free of such introgression.  
820 The prevalence of bidirectional introgression between (*H. sara*, *H. demeter*) and *H. telesiphe* across  
821 the genome, as suggested by our results (Figs. 5–6), could explain the patterns of  $D_{xy}$  in Edelman et  
822 al. (2019). The possibility of the opposite introgression with *H. telesiphe* as the source species  
823 (scenario 2 in Fig. 7a) was also not considered by Edelman et al. (2019).

824 For the chromosome 15b inversion region (580 kb, with only 149 noncoding loci and 167 coding  
825 loci), two sets of estimates were always obtained from independent MCMC runs, each occurring  
826 about 50% of the time. This inversion contains the *cortex* gene known to be involved in mimicry in  
827 the *H. melpomene*/silvaniform group as well as the *H. erato/sara* group of *Heliconius* (Nadeau et al.  
828 2016), although the precise role of the inversion in mimicry is unknown for the species studied here  
829 (Edelman et al. 2019). As for the 2b region, a pair of scenarios correspond to alternative histories  
830 differing in direction of introgression between the common ancestor of the *sara* clade and *H.*  
831 *telesiphe* (Fig. 7b). Again, both scenarios are consistent with the pattern of shared derived  
832 orientation of the inversion region among *H. telesiphe*, *H. hecalesia*, *H. demeter* and *H. sara*, as  
833 represented by tree iv (Fig. 2). In both scenarios, the inversion originated along the branch between  
834 the root and the introgression between the ancestral populations of *H. telesiphe* and *H. demeter/H.*  
835 *sara* (Fig. 7b). As before, we used the root age ( $\tau_r$  under scenario 1 and  $\tau_{\text{ehc}}$  under scenario 2) to  
836 distinguish between these two possibilities. Note that the divergence time estimates in the 15b  
837 region are also highly comparable to those in other genomic regions, with regression slopes ~1.00–  
838 1.07 for the noncoding loci (Fig. S8). The comparison suggests that introgression from the common  
839 ancestor of *H. sara* and *H. demeter* into the ancestor of *H. telesiphe* was more compatible with the  
840 other regions of the genome than the opposite direction (Fig. S4, Table S9), even though the  
841 opposite direction of introgression was marginally more prevalent across the rest of the genome  
842 (Fig. 6). Our result for 15b is concordant with the findings of Edelman et al. (2019), who used  
843 internal branch lengths and  $D_{xy}$  to suggest suggest introgression as a likely scenario, although they  
844 did not consider the alternative scenario 2 (Fig. 7b) of introgression.

845 Our results provide evidence that introgression according to scenario 1 (Fig. 7) between (*H. sara*, *H.*  
846 *demeter*) and *H. telesiphe* rather than ancestral polymorphism is a more likely explanation for the  
847 history of both 2b and 15b inversion regions, and that the introgression was almost wholly  
848 unidirectional. Additional genomes with inversion status from diverse species from this *erato-sara*  
849 clade and better breakpoint characterization would be useful to test these conclusions about the  
850 alternative scenarios.

851

(a) 2b region

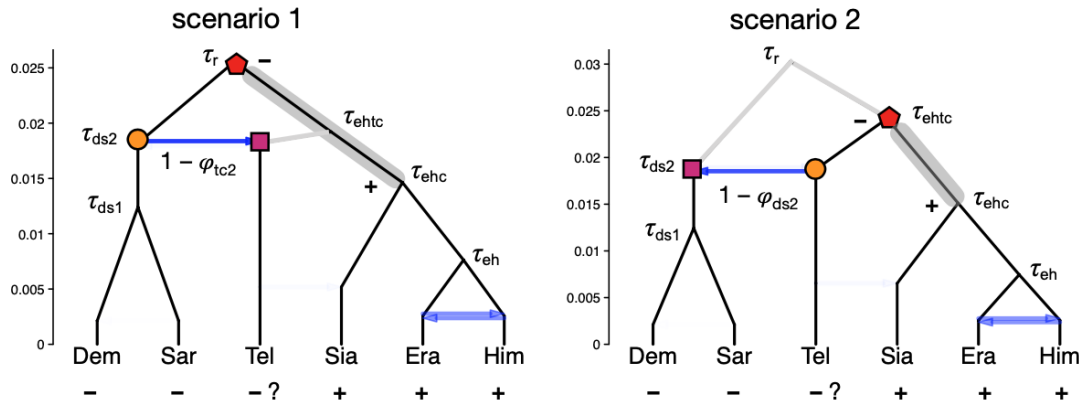

(b) 15b region

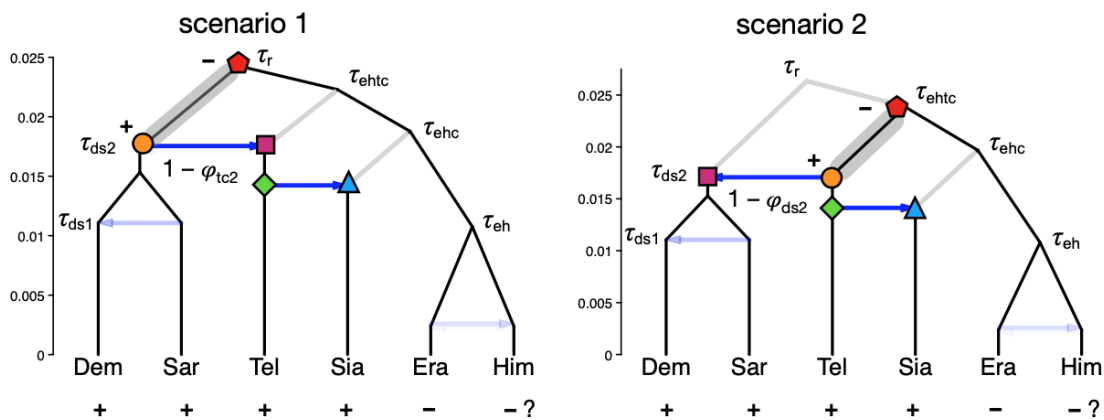

852

853 **Figure 7.** Within-model unidentifiability and possible introgression histories for inversion regions (a)  
 854 2b and (b) 15b, showing estimated divergence times from BPP analysis under the MSci model. Plus  
 855 (+) represents the derived inverted orientation while minus (-) is the ancestral non-inverted  
 856 orientation. Species with uncertain inversion orientation are marked with '?'. Node symbols and  
 857 colours indicate matching nodes and times between the two scenarios. The estimates were based  
 858 on posterior means from noncoding loci. Grey band indicates an ancestral population within which  
 859 the derived inverted orientation (+) may have arisen from the non-inverted orientation (-). Note  
 860 that parameters associated with nodes reached by very few sequences (indicated as grey branches)  
 861 were expected to be poorly estimated, with a wide posterior interval. For example, in scenario 1 for  
 862 2b,  $\tau_{ehtc}$ ,  $\theta_{ehtc}$  and  $\theta_{ehc}$  were poorly estimated (Fig. S4, Table S9).

863

864 *Conclusion*

865 The full-likelihood approach employed here was able not only to detect gene flow among species,  
 866 but also to estimate its direction, timing and magnitude by testing different models of species  
 867 divergence and gene flow using genomic data. We found robust evidence of introgression across the  
 868 genome involving distantly related species deep in the phylogeny as well as sister species in  
 869 shallower parts of the tree. We confirm ancestral gene flow between the *sara* clade and an  
 870 ancestral population of *H. telesiphe*, and infer a likely hybrid origin of *H. hecalesia* as well as gene  
 871 flow between the sister species *H. erato* and *H. himera*. We clarify how introgression among  
 872 ancestral species can explain the history of two chromosomal inversions deep in the phylogeny of  
 873 the *erato-sara* group. For the first time, we estimate key population parameters such as species

874 divergence times and population sizes for modern and ancestral species, providing an opportunity to  
875 understand the speciation and introgression history in finer detail than approximate/heuristic  
876 approaches.

877

#### 878 **COMPETING INTEREST STATEMENT**

879 The authors declare no competing interests.

880

#### 881 **SUPPLEMENTARY MATERIAL**

882 The multilocus sequence datasets for bpp and 3s analyses are available in Zenodo at  
883 <https://doi.org/10.5281/zenodo.5078147>. The C program for calculating the genotyping error rate  
884 given the base-calling error and read depth is at <https://github.com/abacus-gene/genotypecall>.

885

#### 886 **ACKNOWLEDGEMENTS**

887 We thank Nathaniel Edelman, Paul Frandsen, Michael Miyagi, and Bernardo Clavijo for their inputs  
888 to the overall project.

889

#### 890 **FUNDING**

891 The Broad Institute of Harvard and MIT funded the original sequencing of the *Heliconius* genomes  
892 studied here. This study was supported by Harvard University and by Biotechnology and Biological  
893 Sciences Research Council grant (BB/P006493/1 to Z.Y.) and a BBSRC equipment grant  
894 (BB/R01356X/1).

895



896 REFERENCES

897

898 *FIGURE LEGENDS*

899 **Figure 1.** The genotype-calling error rate for a given base-calling error ( $\varepsilon$ ) and read depth ( $n$ ) when  
900 the true genotype is (a) a homozygote for the reference allele ( $GT = 00$ ) or (b) a heterozygote ( $GT =$   
901  $01$ ). Note that the genotype-calling error does not decrease monotonically with the increase in  $n$   
902 when  $\varepsilon$  is fixed, or with the reduction in  $\varepsilon$  when  $n$  is fixed. The calculation is performed using a C  
903 program written by Z.Y. that implements the ML method of Li (2011) and calculates its error rate.

904 **Figure 2.** Posterior probabilities of species trees from BPP analysis of (a) blocks of 100 loci and (b)  
905 blocks of 200 loci across the genome (Table S2) under the MSC model without gene flow. The y-axis  
906 represents the posterior probability and ranges from 0 to 1. Trees (i)–(x) in the legend are MAP trees  
907 in at least one block. Tree (xi) appeared as one of the top eight trees in the sliding-window analysis  
908 of Edelman et al. (2019) but not in our analysis. Tree colours match those in Edelman et al. (2019)  
909 (their Fig. 2). Era: *H. erato*, Him: *H. himera*, Sia: *H. hecalesia*, Tel: *H. telesiphe*, Dem: *H. demeter*, Sar:  
910 *H. sara*.

911 **Figure 3.** Maximum-likelihood estimates of the pairwise migration rate ( $M = Nm$ ) under the IM  
912 model from 3s using all coding and noncoding loci in the autosomes (left column) and in the Z  
913 chromosome (right column; see Table S4 for the number of loci) for each pair of species. The donor  
914 and recipient species of gene flow are given in the y- and x-axis, respectively. *H. melpomene* was  
915 used as an outgroup. Only significant migration rate estimates (by likelihood ratio test at  $p < 0.01$ )  
916 larger than 0.001 are shown. See Figure S2 and Table S8 for estimates of other parameters.

917 **Figure 4.** Proposed introgression model based on the BPP species tree estimation under MSC and 3s  
918 analysis under the IM model. Each horizontal arrow represents a unidirectional introgression event.  
919 Branch lengths represent posterior means of divergence/introgression times in the BPP analysis of all  
920 6,030 noncoding loci in chromosome 1. Estimates for other chromosomal regions are in Figures 5  
921 and S4. Note that the introgression probability  $\varphi_i$  from *H. Sara* to *H. demeter* was estimated to be  
922 zero in all chromosomal regions under this model (Fig. 5).

923 **Figure 5.** Posterior means (dots) and 95% HPD intervals (bars) of introgression probabilities ( $\varphi$ )  
924 under the MSci model of Figure 4 obtained using BPP for the 25 chromosomal regions (see Table S4  
925 for the number of loci). Results for other parameters in the model are in Figure S4. For 2b and 15b,  
926 there is an alternative set of posterior estimates resulting from within-model unidentifiability, shown  
927 in Figure 7.

928 **Figure 6.** Estimated introgression history in each chromosomal region obtained from BPP analysis  
929 under the MSci model of Figure 4 using (a) noncoding and (b) coding loci. Intensity of the horizontal  
930 edges represents the posterior mean of introgression probability, while the y-axis represents the  
931 divergence times in the units of the expected number of mutation per site.

932 **Figure 7.** Within-model unidentifiability and possible introgression histories for inversion regions (a)  
933 2b and (b) 15b, showing estimated divergence times from BPP analysis under the MSci model. Plus  
934 (+) represents the derived inverted orientation while minus (–) is the ancestral non-inverted  
935 orientation. Species with uncertain inversion orientation are marked with ‘?’. Node symbols and  
936 colours indicate matching nodes and times between the two scenarios. The estimates were based on  
937 posterior means from noncoding loci. Grey band indicates an ancestral population within which the  
938 derived inverted orientation (+) may have arisen from the non-inverted orientation (–). Note that  
939 parameters associated with nodes reached by very few sequences (indicated as grey branches) were  
940 expected to be poorly estimated, with a wide posterior interval. For example, in scenario 1 for 2b,  
941  $\tau_{ehtc}$ ,  $\theta_{ehtc}$  and  $\theta_{ehc}$  were poorly estimated (Fig. S4, Table S9).
